# Supplementary material for: Comparative genomics in chicken and Pekin duck using FISH mapping and microarray analysis
Source: PubMed Central journal article supplement (PMC2907691; doi:10.1186/1471-2164-10-357), 2009-08-05
Supplement: 1471-2164-10-357-S1.pdf [file 1471-2164-10-357-S1.pdf]

**Additional file 1:** Chicken (*Gallus gallus*; GGA) BACs successfully hybridized to duck (*Anas platyrhynchos*; APL) macrochromosomes. BACs with these markers successfully hybridized to duck chromosomes. FLpter represents Fractional Length from the p terminus [38]; SD represents standard deviation. For reference, our previous data on turkey (*Meleagris gallopavo*, MGA) [2] is also included for BACs shared by both datasets.

| <b>GGA BAC clone</b> | <b>GGA chromosome</b> | <b>Marker</b> | <b>GGA FLpter</b> | <b>GGA FLpter SD</b> | <b>GGA metaphases</b> | <b>APL chromosome</b> | <b>APL FLpter</b> | <b>APL FLpter SD</b> | <b>APL metaphases</b> | <b>MGA chromosome</b> | <b>MGA FLpter</b> |
|----------------------|-----------------------|---------------|-------------------|----------------------|-----------------------|-----------------------|-------------------|----------------------|-----------------------|-----------------------|-------------------|
| WAG24H22             | GGA1p                 | LEI0068       | 0.23              | 0.03                 | 9                     | APL1p                 | 0.24              | 0.02                 | 8                     |                       |                   |
| WAG30B21             | GGA1p                 | LEI0194       | 0.24              | 0.03                 | 8                     | APL1p                 | 0.14              | 0.03                 | 10                    | MGA1p                 | 0.12              |
| WAG36C14             | GGA1p                 |               | 0.24              | 0.03                 | 6                     | APL1p                 | 0.19              | 0.02                 | 4                     |                       |                   |
| WAG7C9               | GGA1p                 |               | 0.32              | 0.03                 | 6                     | APL1q                 | 0.40              | 0.02                 | 9                     |                       |                   |
| WAG38J21             | GGA1p                 |               | 0.38              | 0.03                 | 7                     | APL1p                 | 0.36              | 0.06                 | 7                     |                       |                   |
| WAG13K4              | GGA1p                 |               | 0.42              | 0.03                 | 9                     | APL1q                 | 0.42              | 0.03                 | 6                     |                       |                   |
| WAG25G16             | GGA1q                 | LEI0101       | 0.47              | 0.03                 | 4                     | APL1q                 | 0.47              | 0.03                 | 8                     |                       |                   |

| <b>GGA BAC<br/>clone</b> | <b>GGA<br/>chromosome</b> | <b>Marker</b> | <b>GGA<br/>FLpter</b> | <b>GGA<br/>FLpter<br/>SD</b> | <b>GGA<br/>metaphases</b> | <b>APL<br/>chromosome</b> | <b>APL<br/>FLpter</b> | <b>APL<br/>FLpter<br/>SD</b> | <b>APL<br/>metaphases</b> | <b>MGA<br/>chromosome</b> | <b>MGA FLpter</b> |
|--------------------------|---------------------------|---------------|-----------------------|------------------------------|---------------------------|---------------------------|-----------------------|------------------------------|---------------------------|---------------------------|-------------------|
| WAG39B16                 | GGA1q                     | MCW0068       | 0.48                  | 0.03                         | 10                        | APL1q                     | 0.48                  | 0.03                         | 3                         |                           |                   |
| WAG28J18                 | GGA1q                     | MCW0058       | 0.40                  | 0.03                         | 6                         | APL1q                     | 0.76                  | 0.03                         | 5                         |                           |                   |
| WAG97I11                 | GGA1q                     | LEI0160       | 0.54                  | 0.03                         | 8                         | APL1q                     | 0.69                  | 0.08                         | 6                         |                           |                   |
| WAG26C18                 | GGA1q                     | MCW0200       | 0.58                  | 0.02                         | 9                         | APL1q                     | 0.64                  | 0.08                         | 6                         |                           |                   |
| WAG12H11                 | GGA1q                     | LEI0091       | 0.63                  | 0.04                         | 8                         | APL1q                     | 0.75                  | 0.09                         | 5                         |                           |                   |
| WAG28I14                 | GGA1q                     | LEI0169       | 0.69                  | 0.02                         | 6                         | APL1q                     | 0.68                  | 0.03                         | 7                         | MAG1q                     | 0.65              |
| WAG123C22                | GGA1q                     | LEI0134       | 0.72                  | 0.02                         | 5                         | APL1q                     | 0.71                  | 0.06                         | 6                         | MGA1q                     | 0.92              |
| WAG65E16                 | GGA1q                     | LEI0107       | 0.73                  | 0.02                         | 8                         | APL1q                     | 0.73                  | 0.05                         | 5                         |                           |                   |
| WAG107M5                 | GGA1q                     | ADL0101       | 0.90                  | 0.04                         | 8                         | APL1q                     | 0.89                  | 0.03                         | 7                         |                           |                   |
| WAG23I2                  | GGA2p                     | MCW0082       | 0.06                  | 0.02                         | 8                         | APL2p                     | 0.09                  | 0.02                         | 8                         | MGA6                      | 1.00              |
| WAG19L16                 | GGA2p                     | ADL0309       | 0.21                  | 0.03                         | 3                         | APL2p                     | 0.27                  | 0.06                         | 5                         | MGA6                      | 0.28              |

| <b>GGA BAC<br/>clone</b> | <b>GGA<br/>chromosome</b> | <b>Marker</b> | <b>GGA<br/>FLpter</b> | <b>GGA<br/>FLpter<br/>SD</b> | <b>GGA<br/>metaphases</b> | <b>APL<br/>chromosome</b> | <b>APL<br/>FLpter</b> | <b>APL<br/>FLpter<br/>SD</b> | <b>APL<br/>metaphases</b> | <b>MGA<br/>chromosome</b> | <b>MGA FLpter</b> |
|--------------------------|---------------------------|---------------|-----------------------|------------------------------|---------------------------|---------------------------|-----------------------|------------------------------|---------------------------|---------------------------|-------------------|
| WAG40A2                  | GGA2p                     | ADL0176       | 0.25                  | 0.03                         | 6                         | APL2p                     | 0.23                  | 0.04                         | 4                         |                           |                   |
| WAG41H16                 | GGA2p                     | MCW0239       | 0.25                  | 0.04                         | 7                         | APL2p                     | 0.24                  | 0.04                         | 11                        |                           |                   |
| WAG26E13                 | GGA2p                     | MCW0131       | 0.25                  | 0.03                         | 5                         | APL2p                     | 0.25                  | 0.04                         | 9                         | MGA6                      | 0.15              |
| WAG85M7                  | GGA2p                     | ADL0120       | 0.27                  | 0.02                         | 3                         | APL2p                     | 0.27                  | 0.06                         | 7                         |                           |                   |
| WAG82N9                  | GGA2p                     | MCW0274       | 0.29                  | 0.03                         | 3                         | APL2p                     | 0.29                  | 0.04                         | 3                         |                           |                   |
| WAG15I23                 | GGA2p                     |               | 0.31                  | 0.04                         | 11                        | APL2p                     | 0.41                  | 0.04                         | 9                         |                           |                   |
| WAG40I2                  | GGA2p                     |               | 0.34                  | 0.03                         | 10                        | APL2p                     | 0.39                  | 0.06                         | 7                         |                           |                   |
| WAG18L21                 | GGA2q                     |               | 0.36                  | 0.03                         | 10                        | APL2p                     | 0.37                  | 0.03                         | 9                         |                           |                   |
| WAG9L1                   | GGA2q                     | LEI0129       | 0.42                  | 0.03                         | 8                         | APL2p                     | 0.31                  | 0.03                         | 6                         | MGA3                      | 0.00              |
| WAG41G5                  | GGA2q                     |               | 0.42                  | 0.03                         | 11                        | APL2p                     | 0.33                  | 0.07                         | 8                         |                           |                   |
| WAG41E24                 | GGA2q                     |               | 0.51                  | 0.04                         | 10                        | APL2q                     | 0.55                  | 0.04                         | 11                        |                           |                   |

| <b>GGA BAC<br/>clone</b> | <b>GGA<br/>chromosome</b> | <b>Marker</b> | <b>GGA<br/>FLpter</b> | <b>GGA<br/>FLpter<br/>SD</b> | <b>GGA<br/>metaphases</b> | <b>APL<br/>chromosome</b> | <b>APL<br/>FLpter</b> | <b>APL<br/>FLpter<br/>SD</b> | <b>APL<br/>metaphases</b> | <b>MGA<br/>chromosome</b> | <b>MGA FLpter</b> |
|--------------------------|---------------------------|---------------|-----------------------|------------------------------|---------------------------|---------------------------|-----------------------|------------------------------|---------------------------|---------------------------|-------------------|
| WAG41C2                  | GGA2q                     | LEI0147       | 0.67                  | 0.03                         | 2                         | APL2q                     | 0.69                  | 0.04                         | 8                         | MGA3                      | 0.46              |
| WAG65M19                 | GGA2q                     | ABR0008       | 0.68                  | 0.02                         | 7                         | APL2q                     | 0.67                  | 0.05                         | 9                         |                           |                   |
| WAG26A22                 | GGA2q                     | MCW0157       | 0.96                  | 0.02                         | 7                         | APL2q                     | 0.96                  | 0.02                         | 7                         |                           |                   |
| WAG29L12                 | GGA3                      | MCW0261       | 0.09                  | 0.04                         | 7                         | APL3                      | 0.12                  | 0.04                         | 8                         | MGA2                      | 0.00              |
| WAG36I7                  | GGA3                      | ADL0370       | 0.24                  | 0.05                         | 6                         | APL3                      | 0.28                  | 0.03                         | 5                         | MGA2                      | 0.26              |
| WAG9P24                  | GGA3                      | MCW0127       | 0.55                  | 0.04                         | 4                         | APL3                      | 0.60                  | 0.04                         | 2                         | MGA2                      | 0.57              |
| WAG112C24                | GGA4p                     | ADL0317       | 0.05                  | 0.02                         | 8                         | APL10                     | 0.45                  | 0.05                         | 6                         | MGA9                      | 1.00              |
| WAG24P2                  | GGA4p                     |               | 0.06                  | 0.02                         | 9                         | APL10                     | 0.80                  | 0.09                         | 8                         |                           |                   |
| WAG23C4                  | GGA4p                     |               | 0.06                  | 0.03                         | 9                         | APL10                     | 0.90                  | 0.06                         | 5                         |                           |                   |
| WAG23I6                  | GGA4p                     | ADL0203       | 0.12                  | 0.02                         | 6                         | APL10                     | 0.34                  | 0.06                         | 4                         | MGA9                      | 0.11              |
| WAG18H15                 | GGA4p                     |               | 0.15                  | 0.04                         | 10                        | APL10                     | 0.24                  | 0.08                         | 6                         |                           |                   |

| <b>GGA BAC<br/>clone</b> | <b>GGA<br/>chromosome</b> | <b>Marker</b> | <b>GGA<br/>FLpter</b> | <b>GGA<br/>FLpter<br/>SD</b> | <b>GGA<br/>metaphases</b> | <b>APL<br/>chromosome</b> | <b>APL<br/>FLpter</b> | <b>APL<br/>FLpter<br/>SD</b> | <b>APL<br/>metaphases</b> | <b>MGA<br/>chromosome</b> | <b>MGA FLpter</b> |
|--------------------------|---------------------------|---------------|-----------------------|------------------------------|---------------------------|---------------------------|-----------------------|------------------------------|---------------------------|---------------------------|-------------------|
| WAG13I5                  | GGA4q                     |               | 0.40                  | 0.06                         | 12                        | APL4                      | 0.52                  | 0.07                         | 9                         |                           |                   |
| WAG22J17                 | GGA4q                     |               | 0.47                  | 0.05                         | 15                        | APL4                      | 0.17                  | 0.07                         | 8                         |                           |                   |
| WAG23K3                  | GGA4q                     |               | 0.53                  | 0.04                         | 9                         | APL4                      | 0.34                  | 0.05                         | 7                         |                           |                   |
| WAG36E8                  | GGA4q                     |               | 0.56                  | 0.03                         | 7                         | APL4                      | 0.61                  | 0.07                         | 10                        |                           |                   |
| WAG21J21                 | GGA4q                     |               | 0.58                  | 0.03                         | 7                         | APL4                      | 0.25                  | 0.08                         | 10                        |                           |                   |
| WAG75K23                 | GGA4q                     |               | 0.88                  | 0.06                         | 12                        | APL4                      | 0.86                  | 0.05                         | 8                         |                           |                   |
| WAG13E2                  | GGA4q                     | LEI0063       | 0.89                  | 0.04                         | 6                         | APL4                      | 0.92                  | 0.04                         | 5                         | MGA4                      | 0.94              |
| WAG18I11                 | GGA4q                     |               | 0.93                  | 0.03                         | 9                         | APL4                      | 0.92                  | 0.03                         | 10                        |                           |                   |
| WAG37H20                 | GGA5                      | MCW0263       | 0.24                  | 0.06                         | 4                         | APL5                      | 0.22                  | 0.07                         | 4                         | MGA5                      | 0.05              |
| WAG40L16                 | GGA5                      | MCW0193       | 0.38                  | 0.06                         | 3                         | APL5                      | 0.46                  | 0.08                         | 5                         | MGA5                      | 0.55              |
| WAG27H3                  | GGA5                      | ROS0013       | 0.42                  | 0.06                         | 8                         | APL5                      | 0.51                  | 0.06                         | 11                        | MGA5                      | 0.48              |

| <b>GGA BAC<br/>clone</b> | <b>GGA<br/>chromosome</b> | <b>Marker</b> | <b>GGA<br/>FLpter</b> | <b>GGA<br/>FLpter<br/>SD</b> | <b>GGA<br/>metaphases</b> | <b>APL<br/>chromosome</b> | <b>APL<br/>FLpter</b> | <b>APL<br/>FLpter<br/>SD</b> | <b>APL<br/>metaphases</b> | <b>MGA<br/>chromosome</b> | <b>MGA FLpter</b> |
|--------------------------|---------------------------|---------------|-----------------------|------------------------------|---------------------------|---------------------------|-----------------------|------------------------------|---------------------------|---------------------------|-------------------|
| WAG03K18                 | GGA5                      | MCW0210       | 0.62                  | 0.05                         | 7                         | APL5                      | 0.54                  | 0.03                         | 4                         | MGA5                      | 0.60              |
| WAG89B24                 | GGA5                      | MCW0113       | 0.70                  | 0.06                         | 9                         | APL5                      | 0.71                  | 0.07                         | 6                         |                           |                   |
| WAG03O23                 | GGA5                      | ADL0166       | 0.81                  | 0.08                         | 5                         | APL5                      | 0.72                  | 0.08                         | 5                         |                           |                   |
| WAG59L17                 | GGA6                      |               | 0.45                  | 0.11                         | 11                        | APL6                      | 0.41                  | 0.13                         | 4                         |                           |                   |
| WAG30C21                 | GGA6                      | ADL0040       | 0.49                  | 0.07                         | 4                         | APL6                      | 0.36                  | 0.10                         | 4                         | MGA8                      | 0.76              |
| WAG21C4                  | GGA6                      |               | 0.62                  | 0.12                         | 10                        | APL6                      | 0.65                  | 0.10                         | 5                         |                           |                   |
| WAG59A2                  | GGA6                      | ROS003        | 0.62                  | 0.08                         | 6                         | APL6                      | 0.66                  | 0.08                         | 7                         | MGA8                      | 0.92              |
| WAG59C5                  | GGA6                      |               | 0.80                  | 0.07                         | 10                        | APL6                      | 0.73                  | 0.11                         | 10                        |                           |                   |
| WAG69P21                 | GGA7                      | LEI0064       | 0.08                  | 0.05                         | 6                         | APL7                      | 0.26                  | 0.07                         | 11                        | MGA7                      | 0.10              |
| WAG59H11                 | GGA7                      |               | 0.17                  | 0.07                         | 12                        | APL7                      | 0.33                  | 0.11                         | 8                         |                           |                   |
| WAG21P13                 | GGA7                      | MCW0120       | 0.31                  | 0.07                         | 6                         | APL7                      | 0.24                  | 0.06                         | 7                         | MGA7                      | 0.29              |

| <b>GGA BAC<br/>clone</b> | <b>GGA<br/>chromosome</b> | <b>Marker</b> | <b>GGA<br/>FLpter</b> | <b>GGA<br/>FLpter<br/>SD</b> | <b>GGA<br/>metaphases</b> | <b>APL<br/>chromosome</b> | <b>APL<br/>FLpter</b> | <b>APL<br/>FLpter<br/>SD</b> | <b>APL<br/>metaphases</b> | <b>MGA<br/>chromosome</b> | <b>MGA FLpter</b> |
|--------------------------|---------------------------|---------------|-----------------------|------------------------------|---------------------------|---------------------------|-----------------------|------------------------------|---------------------------|---------------------------|-------------------|
| WAG38B23                 | GGA7                      |               | 0.40                  | 0.13                         | 10                        | APL7                      | 0.38                  | 0.11                         | 7                         |                           |                   |
| WAG27C3                  | GGA7                      | MCW0201       | 0.44                  | 0.07                         | 3                         | APL7                      | 0.46                  | 0.03                         | 2                         | MGA7                      | 0.40              |
| WAG41A15                 | GGA7                      |               | 0.45                  | 0.11                         | 11                        | APL7                      | 0.54                  | 0.09                         | 10                        |                           |                   |
| WAG44J7                  | GGA7                      |               | 0.64                  | 0.06                         | 4                         | APL7                      | 0.59                  | 0.08                         | 4                         |                           |                   |
| WAG15E10                 | GGA7                      |               | 0.86                  | 0.05                         | 8                         | APL1q                     | 0.84                  | 0.07                         | 9                         |                           |                   |
| WAG29C17                 | GGA8                      | MCW0275       | 0.14                  | 0.03                         | 6                         | APL8                      | 0.45                  | 0.04                         | 3                         | MGA10                     | 0.50              |
| WAG59F7                  | GGA8                      |               | 0.29                  | 0.09                         | 11                        | APL8                      | 0.50                  | 0.14                         | 8                         |                           |                   |
| WAG60M16                 | GGA8                      | ADL0302       | 0.45                  | 0.08                         | 3                         | APL8                      | 0.54                  | 0.05                         | 10                        | MGA10                     | 0.51              |
| WAG21G17                 | GGA8                      |               | 0.61                  | 0.10                         | 9                         | APL8                      | 0.63                  | 0.10                         | 6                         |                           |                   |
| WAG64N5                  | GGA8                      |               | 0.72                  | 0.14                         | 9                         | APL8                      | 0.74                  | 0.09                         | 11                        |                           |                   |
| WAG43P21                 | GGA8                      | ADL0301       | 0.75                  | 0.05                         | 3                         | APL8                      | 0.87                  | 0.07                         | 4                         | MGA10                     | 0.95              |

| <b>GGA BAC<br/>clone</b> | <b>GGA<br/>chromosome</b> | <b>Marker</b> | <b>GGA<br/>FLpter</b> | <b>GGA<br/>FLpter<br/>SD</b> | <b>GGA<br/>metaphases</b> | <b>APL<br/>chromosome</b> | <b>APL<br/>FLpter</b> | <b>APL<br/>FLpter<br/>SD</b> | <b>APL<br/>metaphases</b> | <b>MGA<br/>chromosome</b> | <b>MGA FLpter</b> |
|--------------------------|---------------------------|---------------|-----------------------|------------------------------|---------------------------|---------------------------|-----------------------|------------------------------|---------------------------|---------------------------|-------------------|
| WAG37E21                 | GGA8                      |               | 0.80                  | 0.11                         | 9                         | APL8                      | 0.87                  | 0.06                         | 10                        |                           |                   |
| WAG40M19                 | GGAZ                      |               | 0.08                  | 0.04                         | 14                        | APLZ                      | 0.91                  | 0.04                         | 8                         |                           |                   |
| WAG17D3                  | GGAZ                      |               | 0.11                  | 0.04                         | 19                        | APLZ                      | 0.91                  | 0.04                         | 8                         |                           |                   |
| WAG41P6                  | GGAZ                      |               | 0.27                  | 0.04                         | 10                        | APLZ                      | 0.69                  | 0.08                         | 10                        |                           |                   |
| WAG19N8                  | GGAZ                      |               | 0.48                  | 0.05                         | 10                        | APLZ                      | 0.56                  | 0.06                         | 10                        |                           |                   |
| WAG20L10                 | GGAZ                      |               | 0.74                  | 0.05                         | 10                        | APLZ                      | 0.11                  | 0.06                         | 11                        |                           |                   |
| WAG22P4                  | GGAZ                      |               | 0.80                  | 0.06                         | 8                         | APLZ                      | 0.16                  | 0.06                         | 9                         |                           |                   |
