# Supplementary material for: Comparative genomics in chicken and Pekin duck using FISH mapping and microarray analysis
Source: PubMed Central journal article supplement (PMC2907691; doi:10.1186/1471-2164-10-357), 2009-08-05
Supplement: 1471-2164-10-357-S2.pdf [file 1471-2164-10-357-S2.pdf]

**Additional file 2:** BACs on duck (*Anas platyrhynchos*; APL) microchromosomes. BACs with the named markers successfully hybridized to duck chromosomes. Duck chromosome number after APL10 was assigned as chicken (GGA) chromosome number plus one. The orthologous turkey (*Meleagris gallopavo*, MGA) chromosome (from [2]) is also listed.

| <b>GGA chromosome</b> | <b>GGA BAC<br/>Clone</b> | <b>GGA Marker</b> | <b>APL<br/>chromosome</b> | <b>MGA<br/>chromosome</b> |
|-----------------------|--------------------------|-------------------|---------------------------|---------------------------|
| GGA9                  | WAG9J23                  | ROS0078           | APL9                      | MGA11                     |
| GGA9                  | WAG27D19                 | ADL0191           | APL9                      | MGA11                     |
| GGA9                  | WAG14A21                 | MCW0134           | APL9                      | MGA11                     |
| GGA10                 | WAG8K20                  | B2Msts1           | APL 11                    | MGA12                     |
| GGA10                 | WAG15I8                  | ADL0272           | APL11                     | MGA12                     |
| GGA10                 | WAG33O18                 | CYP19             | APL11                     |                           |
| GGA10                 | WAG18I3                  | MCW0035           | APL 11                    | MGA12                     |
| GGA10                 | WAG8G10                  | MCW0132           | APL11                     | MGA12                     |
| GGA10                 | WAG35L19                 | MCW0003           | APL11                     | MGA12                     |
| GGA11                 | WAG54E23                 | ADL0308           | APL12                     | MGA13                     |
| GGA12                 | WAG4I21                  | SCW0019           | APL13                     | MGA14                     |
| GGA12                 | WAG47D10                 | LEI0099           | APL13                     | MGA14                     |
| GGA13                 | WAG14G12                 | MCW0244           | APL14                     | MGA15                     |
| GGA13                 | WAG18H2                  | MCW0213           | APL 14                    | MGA15                     |
| GGA13                 | WAG27P20                 | MSX2sts1          | APL 14                    | MGA15                     |
| GGA13                 | WAG25H18                 | CAMLGsts1         | APL14                     | MGA15                     |
| GGA13                 | WAG8N24                  | POU4F3sts1        | APL14                     | MGA15                     |
| GGA14                 | WAG43B20                 | MCW0296           | APL15                     | MGA16                     |
| GGA14                 | WAG26J16                 | GCT0908           | APL15                     | MGA16                     |

| <b>GGA chromosome</b> | <b>GGA BAC<br/>Clone</b> | <b>GGA Marker</b> | <b>APL<br/>chromosome</b> | <b>MGA<br/>chromosome</b> |
|-----------------------|--------------------------|-------------------|---------------------------|---------------------------|
| GGA14                 | WAG53L23                 | ADL0200           | APL15                     | MGA16                     |
| GGA15                 | WAG10L1                  | LEI0083           | APL16                     | MGA17                     |
| GGA15                 | WAG109B14                | MCW0031           | APL16                     | MGA17                     |
| GGA15                 | WAG17C11                 | LEI0120           | APL16                     | MGA17                     |
| GGA15                 | WAG62P3                  | SFPQ              | APL16                     |                           |
| GGA15                 | WAG129C21                | ABR0070           | APL16                     | MGA17                     |
| GGA15                 | WAG7G1                   | MCW0211           | APL16                     | MGA17                     |
| GGA15                 | WAG30E18                 | MCW0080           | APL16                     | MGA17                     |
| GGA15                 | WAG93I1                  | CRYBA4sts1        | APL16                     | MGA17                     |
| GGA16                 | WAG65G9                  | MCW0371           | APL17                     | MGA18                     |
| GGA16                 | WAG65G9                  | LEI0258           | APL17                     | MGA18                     |
| GGA17                 | WAG40G23                 | ADL0149           | APL18                     | MGA19                     |
| GGA17                 | WAG13I13                 | MCW0151           | APL 18                    | MGA19                     |
| GGA18                 | WAG0020                  | ADL0184           | APL 19                    | MGA20                     |
| GGA18                 | WAG19B13                 | MCW0045           | APL 19                    | MGA20                     |
| GGA18                 | WAG122G20                | HUJ0010           | APL19                     | MGA20                     |
| GGA18                 | WAG27I7                  | ROS0022           | APL19                     | MGA20                     |
| GGA18                 | WAG34F23                 | ADL0290           | APL19                     | MGA20                     |
| GGA18                 | WAG1D2                   | MCW0219           | APL19                     | MGA20                     |
| GGA18                 | WAG14H23                 | ROS0027           | APL19                     | MGA20                     |
| GGA19                 | -                        | CTG1704           | APL20                     |                           |
| GGA19                 | -                        | CTG7040           | APL20                     |                           |

| <b>GGA chromosome</b> | <b>GGA BAC<br/>Clone</b> | <b>GGA Marker</b> | <b>APL<br/>chromosome</b> | <b>MGA<br/>chromosome</b> |
|-----------------------|--------------------------|-------------------|---------------------------|---------------------------|
| GGA19                 | WAG20G24                 | MCW0256           | APL 20                    | MGA21                     |
| GGA19                 | WAG55M22                 | SCW0024           | APL20                     | MGA21                     |
| GGA20                 | -                        | GTC20050          | APL21                     | MGA22                     |
| GGA20                 | WAG120F16                | MCW0119           | APL21                     | MGA22                     |
| GGA20                 | WAG22L3                  | ADL0193           | APL21                     | MGA22                     |
| GGA20                 | WAG84E10                 | ADL0034           | APL21                     | MGA22                     |
| GGA20                 | WAG10A11                 | FZFsts1           | APL21                     | MGA22                     |
| GGA21                 | WAG24C7                  | AGRIN             | APL22                     |                           |
| GGA21                 | WAG21B10                 | PLODsts1          | APL22                     |                           |
| GGA22                 | WAG32L22                 | ROS0073           | APL23                     |                           |
| GGA22                 | -                        | TVSB3sts1         | APL23                     |                           |
| GGA23                 | -                        | CTG1080           | APL24                     |                           |
| GGA23                 | -                        | CTG1100           | APL24                     |                           |
| GGA23                 | WAG25H8                  | ADL0262           | APL24                     | MGA25                     |
| GGA23                 | WAG29E23                 | LEI0102           | APL24                     | MGA25                     |
| GGA23                 | WAG46K8                  | MCW0165           | APL24                     | MGA25                     |
| GGA23                 | WAG10D11                 | ADL0289           | APL24                     | MGA25                     |
| GGA23                 | WAG96F24                 | LEI0339           | APL24                     | MGA25                     |
| GGA23                 | WAG28L18                 | LEI0090           | APL24                     | MGA25                     |
| GGA24                 | WAG13J20                 | ROS0113A          | APL25                     | MGA26                     |
| GGA24                 | WAG8L4                   | ROS0123           | APL25                     | MGA26                     |
| GGA24                 | WAG20E8                  | APOA1sts          | APL25                     | MGA26                     |

| <b>GGA chromosome</b> | <b>GGA BAC<br/>Clone</b> | <b>GGA Marker</b> | <b>APL<br/>chromosome</b> | <b>MGA<br/>chromosome</b> |
|-----------------------|--------------------------|-------------------|---------------------------|---------------------------|
| GGA24                 | WAG32F12                 | LEI0069           | APL25                     | MGA26                     |
| GGA26                 | -                        | CTG1120           | APL27                     |                           |
| GGA26                 | WAG34F14                 | ABR0330           | APL27                     |                           |
| GGA26                 | WAG5G11                  | MCW0286           | APL27                     | MGA28                     |
| GGA26                 | WAG28I1                  | MCW0069           | APL27                     | MGA28                     |
| GGA26                 | WAG96B10                 | LEI0074           | APL27                     |                           |
| GGA27                 | WAG9E8                   | MCW0146           | APL28                     | MGA29                     |
| GGA27                 | WAG8C15                  | MCW0328           | APL28                     | MGA29                     |
| GGA27                 | WAG3A13                  | GCT0022           | APL28                     | MGA29                     |
| GGA28                 | -                        | CTG0070           | APL29                     |                           |
| GGA28                 | WAG36G5                  | LEI0135           | APL29                     | MGA30                     |
| GGA28                 | WAG24J22                 | ABR0341           | APL29                     | MGA30                     |
| GGA28                 | WAG102C19                | ABR0032           | APL29                     |                           |
| GGA28                 | WAG95C14                 | ABR0054           | APL29                     |                           |
| GGA28                 | WAG75L5                  | GCT0902           | APL29                     |                           |
| GGA28                 | WAG32P6                  | ADL0299           | APL29                     |                           |
| GGA28                 | WAG29E8                  | LEI0067A          | APL29                     | MGA30                     |
